# Supplementary material for: Genotype-Phenotype Correlation in 153 Adult Patients With Congenital Adrenal Hyperplasia due to 21-Hydroxylase Deficiency: Analysis of the United Kingdom Congenital Adrenal Hyperplasia Adult Study Executive (CaHASE) Cohort
Source: PubMed Central journal article supplement — J Clin Endocrinol Metab. 2013 Jan 21;98(2):E346–54. doi: 10.1210/jc.2012-3343 (PMC3651585; doi:10.1210/jc.2012-3343), 2013-01-21
Supplement: supp_jc.2012-3343_12-3343Tab1-3Fig1.pdf [file supp_jc.2012-3343_12-3343Tab1-3Fig1.pdf]

**Supplemental Table 1. Allele frequency of CYP21A2 mutations**

| <b>g.DNA</b>                          | <b>Protein</b>                   | <b>Number of alleles</b> | <b>% of total</b> | <b>Mutation group</b> |
|---------------------------------------|----------------------------------|--------------------------|-------------------|-----------------------|
|                                       | Gene deletion/<br>Chimeric genes | 94                       | 30.72             | Null                  |
| g.92C>T                               | P30L                             | 9                        | 2.94              | C                     |
| g.658 A/C>G                           | I2G                              | 75                       | 24.51             | A                     |
| g.711-718del                          | D8bp (G110del8nt)                | 5                        | 1.63              | Null                  |
| g.1004T>A                             | I172N                            | 44                       | 14.38             | B                     |
| g.1385T>A,<br>g.1388T>A,<br>g.1394T>A | e6 cluster                       | 1                        | 0.33              | Null                  |
| g.1688G>T                             | V281L                            | 22                       | 7.19              | C                     |
| g.1999C>T                             | Q318X                            | 9                        | 2.94              | Null                  |
| g.2113C>T                             | R356W                            | 15                       | 4.90              | Null                  |
| g.2584C>T                             | P453S                            | 6                        | 1.96              | C                     |

**Multiple mutations on one allele**

|  |             |   |      |      |
|--|-------------|---|------|------|
|  | I2G+P453S   | 1 | 0.33 | A    |
|  | I2G+D8bp    | 2 | 0.65 | Null |
|  | I172N+P453S | 2 | 0.65 | B    |
|  | e6+V281L    | 1 | 0.33 | Null |
|  | V281L+P453S | 1 | 0.33 | C    |

**Rare mutations**

|                     |                      |          |             |             |
|---------------------|----------------------|----------|-------------|-------------|
| g.188A>T            | H62L+P453S           | 2        | 0.65        | B           |
| <b>g.752C&gt;T</b>  | <b>R124C</b>         | <b>1</b> | <b>0.33</b> | <b>B</b>    |
| <b>g.803C&gt;T</b>  | <b>Q141X</b>         | <b>1</b> | <b>0.33</b> | <b>Null</b> |
| g.1769C>T           | L308F                | 1        | 0.33        | B           |
| <b>g.2047delG</b>   | <b>V334fsX28</b>     | <b>1</b> | <b>0.33</b> | <b>Null</b> |
| <b>g.2350G&gt;C</b> | <b>IVS9 +1G&gt;C</b> | <b>1</b> | <b>0.33</b> | <b>Null</b> |
| g.2503C>T           | R426C                | 1        | 0.33        | Null        |
| g.2504G>A           | R426H                | 1        | 0.33        | Null        |
| g.2530C>T           | R435C                | 1        | 0.33        | B           |
| g.2675G>C           | R483P                | 1        | 0.33        | B           |
| <b>g.2674dupC</b>   | <b>R483PfsX40</b>    | <b>1</b> | <b>0.33</b> | <b>Null</b> |

Alleles without mutation 7 2.29  
total 306 100.00

Novel mutations are shown in bold font type.

**Supplemental Table 2. Mineralocorticoid replacement by mutation group and renin levels**

|                                                                    | Mutation group |            |            |            | Significance of Mutation group | Significance of Paired Comparisons |           |           |        |        |        |
|--------------------------------------------------------------------|----------------|------------|------------|------------|--------------------------------|------------------------------------|-----------|-----------|--------|--------|--------|
|                                                                    | Null           | A          | B          | C          |                                | Null vs A                          | Null vs B | Null vs C | A vs B | A vs C | B vs C |
| <b>Renin in Patients Not on Fludrocortisone</b>                    |                |            |            |            |                                |                                    |           |           |        |        |        |
| No fludrocortisone, renin within reference range                   | 0 (0%)         | 2 (22.2%)  | 11 (52.4%) | 16 (72.7%) | 0.023                          | .                                  | .         | .         | .      | .      | .      |
| No fludrocortisone, high renin (1 or 2 fold above reference range) | 2 (100%)       | 7 (77.8%)  | 9 (42.9%)  | 4 (18.2%)  | 0.003**                        | 1.000                              | 0.217     | 0.046     | 0.118  | 0.003  | 0.104  |
| No fludrocortisone, renin lower than mid reference range           | 0 (0%)         | 0 (0%)     | 1 (4.8%)   | 2 (9.1%)   | 0.902                          | .                                  | .         | .         | .      | .      | .      |
| <b>Renin in Patients on Fludrocortisone</b>                        |                |            |            |            |                                |                                    |           |           |        |        |        |
| Fludrocortisone, high renin (1 or 2 fold above reference range)    | 19 (79.2%)     | 21 (70.0%) | 5 (41.7%)  | 1 (11.1%)  | 0.001**                        | 0.540                              | 0.058     | 0.001***  | 0.158  | 0.005  | 0.178  |
| Fludrocortisone, renin mid to upper reference range                | 2 (8.3%)       | 8 (26.7%)  | 6 (50.0%)  | 6 (66.7%)  | 0.002**                        | 0.158                              | 0.011     | 0.002***  | 0.169  | 0.047  | 0.660  |
| Fludrocortisone, low – renin lower than mid reference range        | 3 (12.5%)      | 1 (3.3%)   | 1 (8.3%)   | 2 (22.2%)  | 0.241                          | .                                  | .         | .         | .      | .      | .      |

\*Significant at the 5% level, \*\*Significant at the Bonferroni adjusted level of 1.67%, \*\*\* Significant at the Bonferroni adjusted level of 0.28%

**Supplemental Table 3. Female fertility and attempted pregnancy**

| <b>Mutation group</b>                | <b>Null</b> | <b>A</b>   | <b>B</b>   | <b>C</b>   |
|--------------------------------------|-------------|------------|------------|------------|
| Patients (n)                         | 19          | 24         | 25         | 29         |
| Patients with at least one child (n) | 1           | 2          | 8          | 13         |
|                                      |             |            |            |            |
| Never tried (n)                      | 15 (79.9%)  | 19 (79.2%) | 12 (48.0%) | 11 (37.9%) |
|                                      |             |            |            |            |
| Patients , < 30 yrs (n)              | 8           | 9          | 3          | 10         |
| Never tried < 30 yrs (n)             | 8 (100%)    | 8 (89%)    | 3 (100%)   | 6 (60%)    |

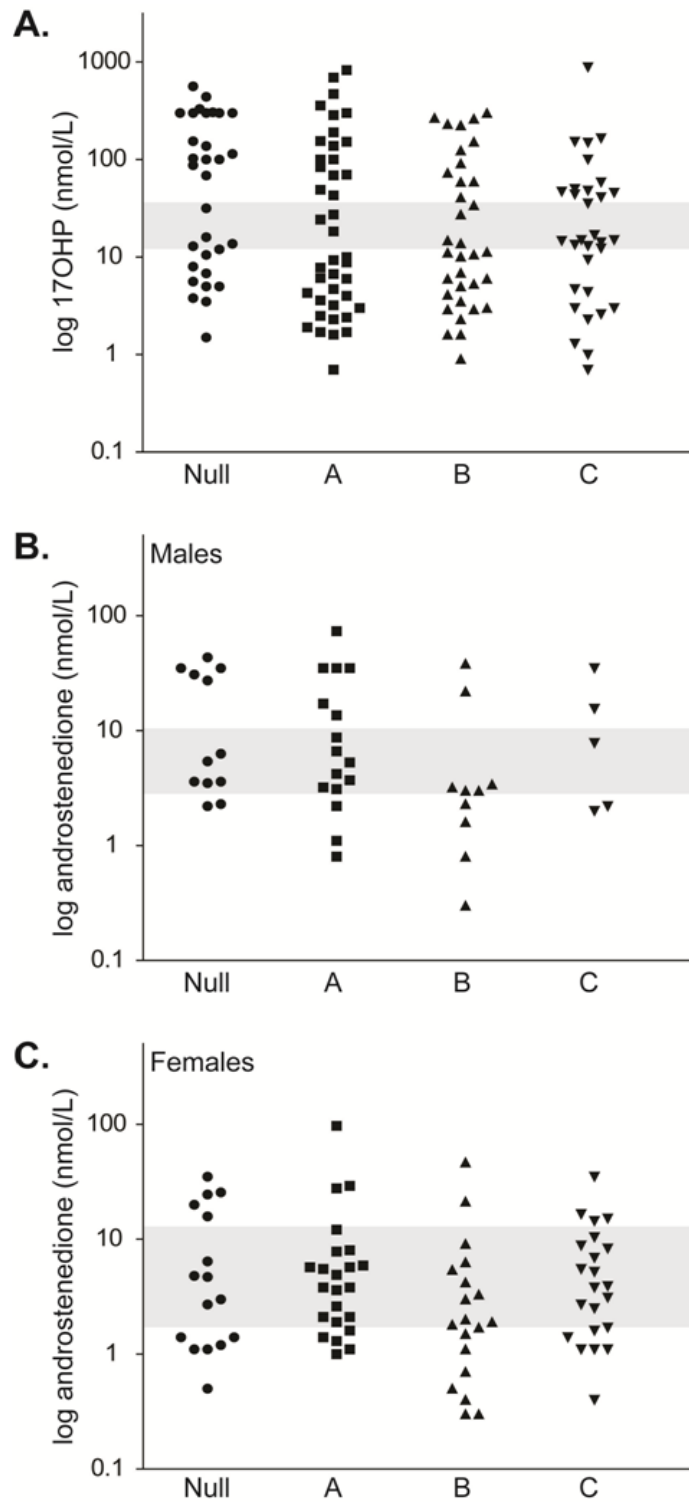

**Supplemental Figure 1**

Serum levels of 17OHP (A) androstenedione (B, C for males and females, respectively) in samples from CAH patients in the morning after intake of the usual glucocorticoid morning dose by mutation group. The *shaded areas* represent recommended target range (Merke DP, Bornstein SR 2005 Congenital adrenal hyperplasia. Lancet 365:2125-213634). The majority of patients were outside these therapeutic target ranges for 17OHP; however normal androstenedione concentrations were more frequently achieved.
